# Supplementary material
Source: MDPI journal article supplement (https://www.mdpi.com/1999-4907/14/1/72)
Supplement: s1 [file s1]

## Supplementary Materials

**Table S1** Basic physicochemical characteristics of the soil from the treatment plots before fertilization. There are no significant differences of any soil properties.

|    | SOC                   | Total N               | Total P               | pH        | C:N        |
|----|-----------------------|-----------------------|-----------------------|-----------|------------|
|    | (g kg <sup>-1</sup> ) | (g kg <sup>-1</sup> ) | (g kg <sup>-1</sup> ) |           |            |
| CT | 21.20±2.20            | 1.29±0.13             | 0.29±0.02             | 4.30±0.04 | 16.60±1.09 |
| N  | 20.82±1.98            | 1.24±0.12             | 0.29±0.02             | 4.42±0.07 | 17.05±1.50 |
| P  | 18.98±0.67            | 1.14±0.05             | 0.33±0.02             | 4.58±0.06 | 16.64±0.53 |
| NP | 18.97±1.04            | 1.10±0.06             | 0.30±0.02             | 4.51±0.08 | 17.23±0.53 |

**Table S2** Results (*P* values) of one-way ANOVA for N and P fertilization on the chemical variables in different aggregate fractions.

|                  | MeA    | MaA    | MiA    |
|------------------|--------|--------|--------|
| SOC              | 0.097  | 0.011  | 0.009  |
| Total N          | 0.076  | 0.050  | 0.043  |
| Total P          | <0.001 | 0.002  | <0.001 |
| C:N              | 0.755  | 0.194  | 0.184  |
| LSOC             | 0.008  | 0.001  | 0.016  |
| K <sup>+</sup>   | 0.946  | 0.842  | 0.928  |
| Na <sup>+</sup>  | 0.724  | 0.154  | 0.034  |
| Ca <sup>2+</sup> | 0.629  | 0.827  | 0.537  |
| Mg <sup>2+</sup> | 0.382  | 0.542  | 0.473  |
| pH               | 0.003  | <0.001 | <0.001 |

MeA, MaA and MiA represent mega-aggregates (> 2.0 mm), macro-aggregates (0.25–2.0 mm)

and micro-aggregates (< 0.25 mm). SOC and LSOC denote soil organic C and labile SOC, respectively. K, Na<sup>+</sup>, Ca<sup>2+</sup> and Mg<sup>2+</sup> denote exchangeable K, Na, Ca and Mg cations, respectively.

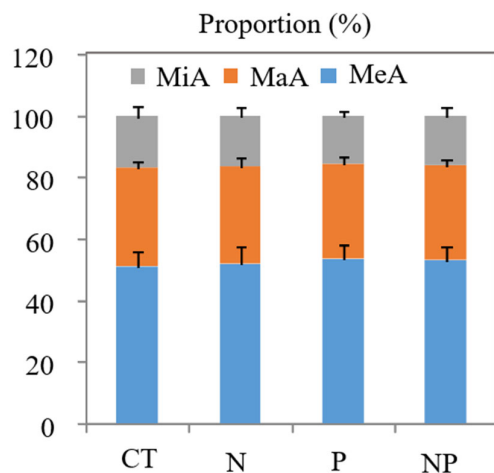

**Figure S1** N and P fertilization had no effect on soil aggregate fractions in a subtropical forest.

MeA, MaA and MiA represent mega-aggregates (> 2.0 mm), macro-aggregates (0.25–2.0 mm) and micro-aggregates (< 0.25 mm).

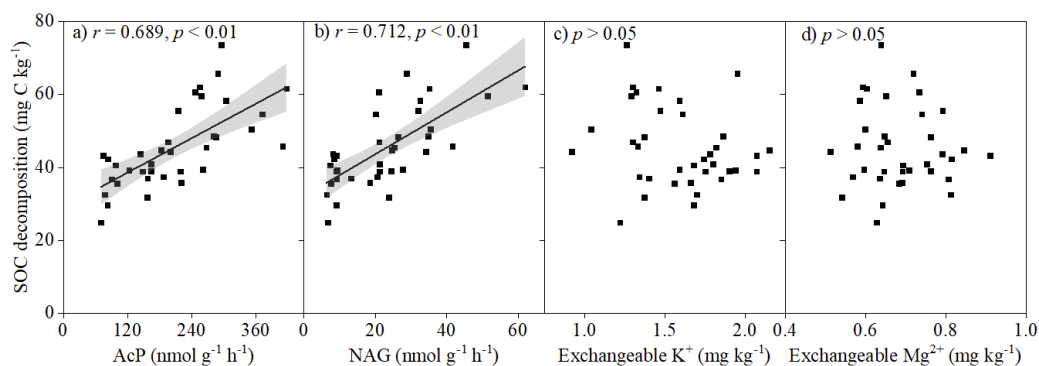

**Figure S2** Pearson's correlation coefficients of enzyme activities (a, b) and soil chemical properties (c, d) with cumulative soil organic carbon (SOC) decomposition. AcP and NAG represent acid phosphatase and  $\beta$ -N-acetyl-glucosaminidase, respectively. The shaded area represents 95% confidence interval.
